# Supplementary material for: Front-of-pack nutrition labelling to promote healthier diets: current practice and opportunities to strengthen regulation worldwide
Source: PubMed Central journal article supplement — BMJ Glob Health. 2019 Dec 14;4(6):e001882. doi: 10.1136/bmjgh-2019-001882 (PMC6936575; doi:10.1136/bmjgh-2019-001882), 2019-12-14
Supplement: bmjgh-2019-001882supp001.pdf [file bmjgh-2019-001882supp001.pdf]

| Heart Symbol           | Finland                                                                                                    | 2000                                                              | High                                                 | Interpretive, Positive signpost                                                                                      | V                                                 | X                                                    | Y Red                                                                                                                                                                                                                                     | Y                                                                                                                                              | Better Choice                                                                                                                | Total fat, saturated and unsaturated fat, sodium, total sugar and fibre                                                               | Thresholds set by category                                                                                                                                                                    | Limited sense, construct tested (unpublished)                                                                                                                                                          | Per 100g/100ml                                                                                                                                                                                                                                                                                                                                                                      | Y                                                                                                                                 | Y                                                                  | Can be used by restaurants and caterers since 2008                                                                                                                                                                                                                                                                                                                                                                                                                                                                                                                                                                           | Y                                                                                                                                                                                                                                                                                                                                                                                                                                                                                                                                                                                                                     | Education campaign by administering organisations                                                                                                                                                                                                                                                                                                                                                                                                                 | Civil society, gov later endorsed                                                                                                                               | Ministry of Social Affairs and Health endorsed the label as one of 118 recommendations in the Action Plan for Promoting Finnish Heart Health in 1998. | Finnish Heart Association with Finnish Diabetic Association established, consumer groups consulted during development                                                                                                                                                                                                                                                                                                                                                                                                                                                                                                                                                            | Finnish Heart Association with Finnish Diabetic Association with input from experts in nutrition and medicine and the Finnish Food Safety Authority. Criteria based on Finnish nutrition recommendations taking into consideration nutritional composition of products on market. | Finnish Heart Association with Finnish Diabetic Association | Uptake measured: website reports 1300 products in Finnish market currently approved to carry from 123 companies being used by more than 300 restaurants; Consumer use measured: questions on consumer use integrated into annual national surveys on Health Behaviours in Finnish adults since 2001 (self-reported use). Shows awareness and use good in all age and educational groups. | Not identified | Criteria regularly updated by expert group of six professionals in medicine or nutrition appointed by the associations. | Spot checks that products meet nutrition criteria using fees from applications. No information identified about sanctions. | Y. Expert group reviews applications. Annual use fee payable to administer scheme. | WCRF | Website: <a href="http://www.sydänmerkki.fi/en/">http://www.sydänmerkki.fi/en/</a> |
|------------------------|------------------------------------------------------------------------------------------------------------|-------------------------------------------------------------------|------------------------------------------------------|----------------------------------------------------------------------------------------------------------------------|---------------------------------------------------|------------------------------------------------------|-------------------------------------------------------------------------------------------------------------------------------------------------------------------------------------------------------------------------------------------|------------------------------------------------------------------------------------------------------------------------------------------------|------------------------------------------------------------------------------------------------------------------------------|---------------------------------------------------------------------------------------------------------------------------------------|-----------------------------------------------------------------------------------------------------------------------------------------------------------------------------------------------|--------------------------------------------------------------------------------------------------------------------------------------------------------------------------------------------------------|-------------------------------------------------------------------------------------------------------------------------------------------------------------------------------------------------------------------------------------------------------------------------------------------------------------------------------------------------------------------------------------|-----------------------------------------------------------------------------------------------------------------------------------|--------------------------------------------------------------------|------------------------------------------------------------------------------------------------------------------------------------------------------------------------------------------------------------------------------------------------------------------------------------------------------------------------------------------------------------------------------------------------------------------------------------------------------------------------------------------------------------------------------------------------------------------------------------------------------------------------------|-----------------------------------------------------------------------------------------------------------------------------------------------------------------------------------------------------------------------------------------------------------------------------------------------------------------------------------------------------------------------------------------------------------------------------------------------------------------------------------------------------------------------------------------------------------------------------------------------------------------------|-------------------------------------------------------------------------------------------------------------------------------------------------------------------------------------------------------------------------------------------------------------------------------------------------------------------------------------------------------------------------------------------------------------------------------------------------------------------|-----------------------------------------------------------------------------------------------------------------------------------------------------------------|-------------------------------------------------------------------------------------------------------------------------------------------------------|----------------------------------------------------------------------------------------------------------------------------------------------------------------------------------------------------------------------------------------------------------------------------------------------------------------------------------------------------------------------------------------------------------------------------------------------------------------------------------------------------------------------------------------------------------------------------------------------------------------------------------------------------------------------------------|-----------------------------------------------------------------------------------------------------------------------------------------------------------------------------------------------------------------------------------------------------------------------------------|-------------------------------------------------------------|------------------------------------------------------------------------------------------------------------------------------------------------------------------------------------------------------------------------------------------------------------------------------------------------------------------------------------------------------------------------------------------|----------------|-------------------------------------------------------------------------------------------------------------------------|----------------------------------------------------------------------------------------------------------------------------|------------------------------------------------------------------------------------|------|------------------------------------------------------------------------------------|
| Total FOPs Systems: 31 | Total countries covered: 31, Plus EU Countries with 2 systems: Finland, Mexico, Thailand, Malaysia, Israel | Jurisdiction adoption Prior to 2000: 4 2000-2009: 6 2010-2019: 12 | 16 high income 9 upper middle 4 lower middle 1 EU UK | 5 non-interpretive 4 nutrient-specific 6 nutrient-specific warnings 2 overall spectrum ratings 14 positive signposts | 10 mandatory initiatives 21 voluntary initiatives | 27/30 (1 not able to be identified; 1 not published) | 17 had explicit reference to health (including formulations in policy documents. Non-interpretive labels were not intended to incentivise reformulation. Only specified colour are Finland high salt warning (old) and health Star Rating | 23 use specific logos or symbols Of these: Gov signpost: 6 (Chile, Peru, Iran, Singapore, Croatia, Uruguay) Ref to 'High N': 6 Excess: Uruguay | 24 specify use of words: Gov signpost: 6 (Chile, Peru, Iran, Singapore, Croatia, Uruguay) Ref to 'High N': 6 Excess: Uruguay | Sodium: 28 Sat fat: 22 Energy: 14 Total sugar: 21 Total fat: 8 Trans fat: 8 Added sugar: 6 FVNL: 2 Protein: 3 Fibre: 15 Wholegrain: 5 | Not relevant for non-reductive systems based on government NRVs. Only 6 of remaining 28 had some form of validation identified. France's Nutriscore had most robust forms of validation done. | 25 packaged foods generally 4 limited categories of packaged foods Chile packaged foods but not those without added sugar, salt or saturated fats 1 drinks only - Sri Lanka but plan to extend to food | 11 FOPs extend beyond packaged foods and labels 5 positive signposts could be applied to unpackaged fresh foods, mostly fruit and vegetables and also fresh meat and seafood The Finnish high salt warning was extended to unpackaged retail items in 2016 5 FOPs (positive signposts) applied to prepared meals served outside the home in restaurants or other catering services. | Education campaign identified for 17 systems Part of comprehensive/broader plan: Marketing policies: Food in public institutions: | In some cases, an industry-initiated government e.g. Malaysian GDA | Ten mandatory FOPNs developed through legislative process. Involve industry on committees developing Iran, Israel (2), Health Star Rating, Choices endorsed by the French government for example, the French Nutri-Score, while voluntary was strongly government led. Ministry of Health or similar - but some mention multi-sectoral involvement including Slovenia (Ministry of Agriculture, Forestry and Food), UAE (Abu Dhabi Quality and Conformity Council Working Group for Food and Agriculture), Finland salt warning (Ministry of Trade and Industry), Chilean Stop Sign (Ministry of Health, Education, Economy) | 12 not able to identify role of other stakeholders. Involve industry on committees developing Iran, Israel (2), Health Star Rating, Choices endorsed by the French government for example, the French Nutri-Score, while voluntary was strongly government led. Ministry of Health or similar - but some mention multi-sectoral involvement including Slovenia (Ministry of Agriculture, Forestry and Food), UAE (Abu Dhabi Quality and Conformity Council Working Group for Food and Agriculture), Finland salt warning (Ministry of Trade and Industry), Chilean Stop Sign (Ministry of Health, Education, Economy) | Identified some information on development of Nutrient Criteria for 22 systems. Not relevant for non-interpretive systems (6), four other systems couldn't identify. 12 government led 4 Choice-style 'independent scientific committee' consulted in several Chile Stop Sign, Nutri-Score, Health Star Rating, Mexican Nutri-Selle mark, 3 industry involvement (above Health), Choices: 2 3 civil society led 'Unspecified gov agency' - Zambian Good Food Logo | Identify for 30 systems. Ministry of Health or equivalent: 13 Food and Drug Administration or equivalent: 9 Update: 10 FOPNs, sometimes self-report by industry | Identify some form of monitoring for 17 FOPNs. 18/30 FOPNs. N/A for 5 non-interpretive FOPNs. Able to identify some form of criteria in 10 FOPNs.     | Some form of sanction or enforcement mechanism identified for 17 FOPNs. 10 systems have pre-market approval e.g. licensing scheme for use. Some free, at https://www.wcrf.org/en/policy/nourish-reg-database WHO EURL: World Health Organization European Region Health Evidence Network Synthesis and Report on FOP Nutrition Labelling: <a href="http://www.euro.who.int/_data/assets/pdf_file/0007/38446/Report-EU-on-FOPs.pdf">http://www.euro.who.int/_data/assets/pdf_file/0007/38446/Report-EU-on-FOPs.pdf</a> Global database on the Implementation of Nutrition Action (GNA): <a href="https://www.who.int/nutrition/gna/en/">https://www.who.int/nutrition/gna/en/</a> |                                                                                                                                                                                                                                                                                   |                                                             |                                                                                                                                                                                                                                                                                                                                                                                          |                |                                                                                                                         |                                                                                                                            |                                                                                    |      |                                                                                    |

Systems were considered unique based on their FOP nutrition label format and set of regulations for implementation.
